# Supplementary material
Source: PubMed Central journal article supplement (PMC4456678)
Supplement: NIHMS537326-supplement-supplement_1.pdf [file NIHMS537326-supplement-supplement_1.pdf]

## Supplementary Data

### Blind participants who constituted group 1

| Subject No. | Age (Yrs.) | Sex | Cause of Blindness     | Age at onset of Blindness (Yrs.) | *Visual Acuity (Left / Right) |
|-------------|------------|-----|------------------------|----------------------------------|-------------------------------|
| 1           | 13         | M   | Eye infection          | <2                               | 0/0                           |
| 2           | 12.6       | M   | Eye infection          | <2                               | 0/0                           |
| 3           | 12.5       | M   | Cataract               | 1.5                              | LP                            |
| 4           | 13         | M   | unknown                | 2                                | 0/0                           |
| 5           | 13         | M   | Eye infection          | <1.5                             | 0/0                           |
| 6           | 12         | M   | Optic nerve atrophy    | 2                                | 0/0                           |
| 7           | 12         | M   | Microphthalmos         | 0                                | 0/0                           |
| 8           | 14         | M   | Microphthalmos         | 0                                | 0/HM                          |
| 9           | 12         | M   | Optic nerve atrophy    | 2.5                              | 0/0                           |
| 10          | 13         | M   | Eye infection          | 2                                | 0/0                           |
| 11          | 13.5       | M   | Microphthalmos         | 0                                | 0/0                           |
| 12          | 14         | M   | Fundus Coloboma        | 0                                | 0/0                           |
| 13          | 12         | M   | Glaucoma(Post measles) | 3                                | 0/0                           |
| 14          | 13.6       | M   | Microphthalmos         | 0                                | HM/0                          |
| 15          | 12         | M   | Cataract               | 2                                | 0/LP                          |
| 16          | 14         | F   | Cataract               | <3                               | LP                            |
| 17          | 14.5       | F   | Microphthalmos         | 0                                | 0/0                           |
| 18          | 12         | F   | Optic nerve atrophy    | 2.5                              | 0/0                           |
| 19          | 12.5       | F   | Glaucoma(Post measles) | 2                                | LP/0                          |
| 20          | 13         | F   | Retinal detachment     | 3                                | 0/0                           |
| 21          | 13         | F   | unknown                | <2                               | 0/0                           |
| 22          | 13         | F   | Microphthalmos         | 0                                | LP/0                          |
| 23          | 14         | F   | Glaucoma               | <2.5                             | 0/LP                          |
| 24          | 15         | F   | Optic nerve atrophy    | 3                                | 0/0                           |
| 25          | 14         | F   | Cataract               | 2                                | LP                            |
| 26          | 12         | F   | Eye infection          | 1.5                              | 0/0                           |
| 27          | 13         | F   | Eye infection          | 2                                | 0/0                           |
| 28          | 13.5       | F   | Optic nerve atrophy    | 2.5                              | 0/0                           |
| 29          | 12.5       | F   | Glaucoma               | 2                                | 0/LP                          |
| 30          | 14         | F   | Eye infection          | <2.5                             | 0/0                           |

### Children with congenital cataracts who constituted group 3

| Age | Gender | Pre-op acuity | Ophthalmic diagnosis            | Post-op acuity |
|-----|--------|---------------|---------------------------------|----------------|
| 17  | M      | HM            | TOTAL Cataract                  | 1.5            |
| 12  | M      | PL/PR         | TOTAL Cataract                  | 1.47           |
| 22  | M      | FC@50cm       | TOTAL Cataract                  | 1.39           |
| 16  | M      | PL/PR         | Membranous cat.                 | 1.47           |
| 12  | M      | PL/PR         | Polar (R) + membranous cat. (L) | 1.3            |
| 12  | M      | FC@50cm       | Zonular cataract                | 1.17           |
| 16  | M      | PL/PR         | Membranous cat.                 | 1.17           |
| 14  | M      | PL/PR         | TOTAL Cataract                  | 1.43           |
| 15  | M      | HM            | Membranous cat.                 | 1.51           |
| 12  | M      | PL/PR         | Polar Cat.                      | 1.47           |

HM: Hand movement

PL: Perception of light

PR: Projection of rays (direction of light)

FC: Finger counting
